# Supplementary material
Source: PubMed Central journal article supplement (PMC2914680)
Supplement: NIHMS92527-supplement-1.pdf [file NIHMS92527-supplement-1.pdf]

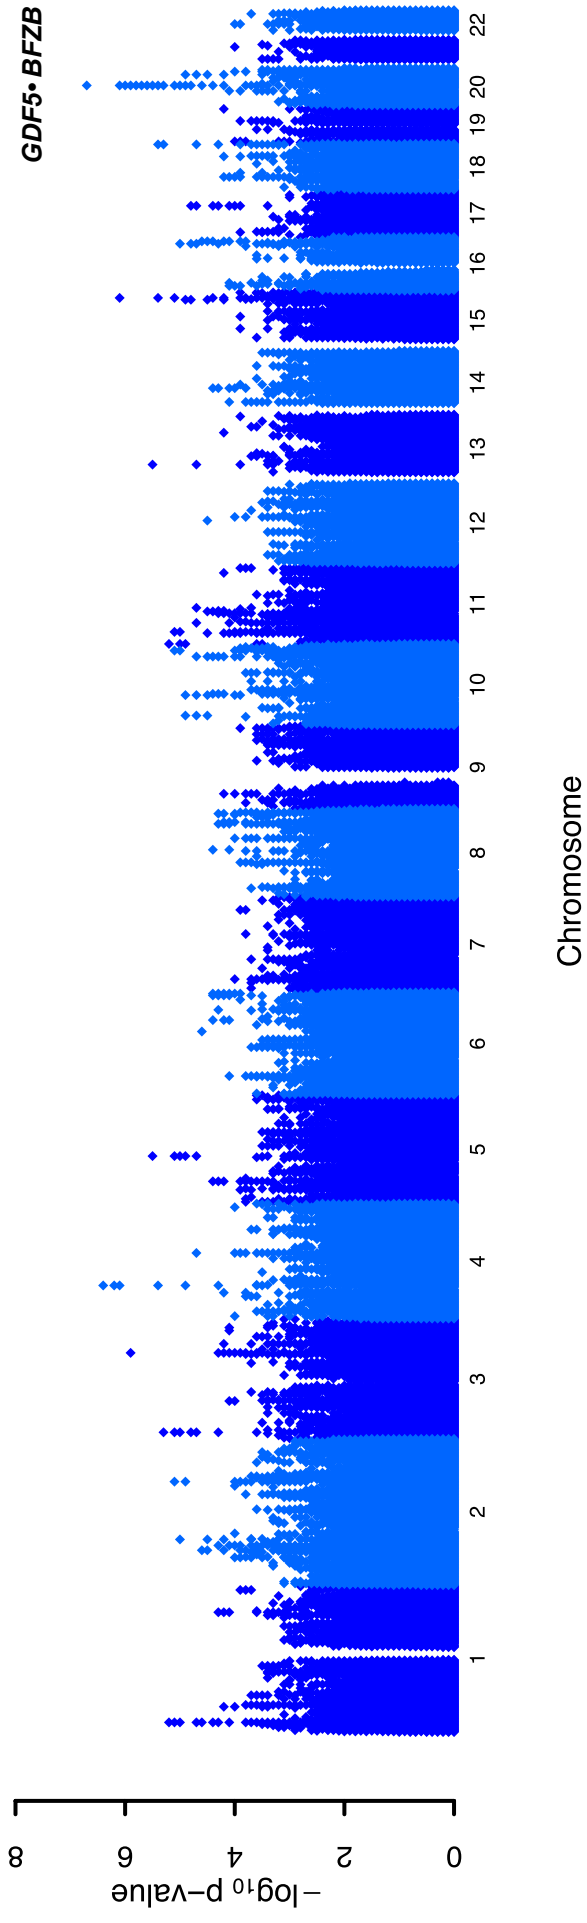

**Supplementary Figure 1: Summary of genome-wide association scan for height.**  
Combined genome-wide association scan results for SARDINIA and FUSION plotted as  $-\log_{10}$  p-value.  
The position of *GDF5* – *BFZB* is noted.
