# Supplementary material
Source: PubMed Central journal article supplement (PMC2914680)
Supplement: NIHMS92527-supplement-2.pdf [file NIHMS92527-supplement-2.pdf]

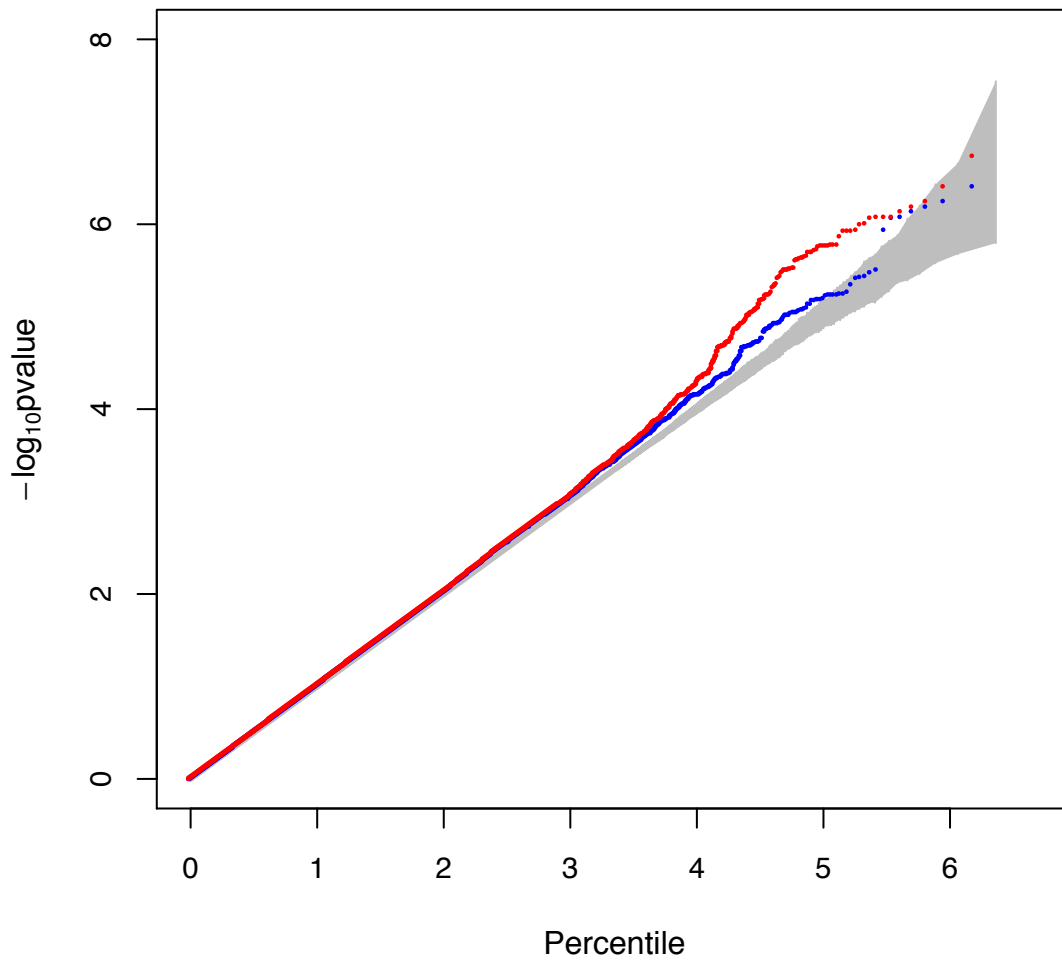

**Supplementary Figure 2: Quantile-quantile plot of SNPs associated with height in the SardiNIA and FUSION studies.** Red symbols represent all genotyped and imputed SNPs. Blue symbols represent all genotyped and imputed SNPs not located within 250 kb of rs6060369. The gray area corresponds to the 90% confidence region from a null distribution of p-values (generated from 100 simulations).
